# Supplementary material for: Background Selection as Baseline for Nucleotide Variation across the Drosophila Genome
Source: PubMed Central journal article supplement (PMC4072542; doi:10.1371/journal.pgen.1004434), 2014-06-26
Supplement: pgen.1004434.s003.pdf [file pgen.1004434.s003.pdf]

**Table S1. Summary of *B* estimates for different BGS models**

|                       |          | Deleterious Mutation Rate ( $U = 1.2$ ) |                    |                      |                   | Low Deleterious Mutation Rate ( $U = 0.6$ ) |                    |                      |                   |
|-----------------------|----------|-----------------------------------------|--------------------|----------------------|-------------------|---------------------------------------------|--------------------|----------------------|-------------------|
|                       |          | Log-Normal DDFE                         |                    | Gamma DDFE           |                   | Log-Normal DDFE                             |                    | Gamma DDFE           |                   |
|                       |          | Rec. CO+GC                              | Rec. CO            | Rec. CO+GC           | Rec. CO           | Rec. CO+GC                                  | Rec. CO            | Rec. CO+GC           | Rec. CO           |
|                       |          | $M_{LN,StdMut,CO+GC}^*$                 | $M_{LN,StdMut,CO}$ | $M_{G,StdMut,CO+GC}$ | $M_{G,StdMut,CO}$ | $M_{LN,LowMut,CO+GC}$                       | $M_{LN,LowMut,CO}$ | $M_{G,LowMut,CO+GC}$ | $M_{G,LowMut,CO}$ |
| <b>Whole genome</b>   |          |                                         |                    |                      |                   |                                             |                    |                      |                   |
| All                   | Median   | <b>0.591</b>                            | 0.470              | 0.428                | 0.337             | 0.769                                       | 0.686              | 0.654                | 0.581             |
|                       | min, max | <b>0 , 0.897</b>                        | 0 , 0.886          | 0 , 0.870            | 0 , 0.855         | 0.005 , 0.947                               | 0.002 , 0.942      | 0.002 , 0.933        | 0.001 , 0.925     |
|                       | 90% CI   | <b>0.005 , 0.800</b>                    | 0 , 0.756          | 0.001 , 0.707        | 0 , 0.658         | 0.074 , 0.895                               | 0.022 , 0.870      | 0.039 , 0.841        | 0.011 , 0.811     |
| Autosomes             | Median   | <b>0.559</b>                            | 0.432              | 0.395                | 0.303             | 0.748                                       | 0.658              | 0.628                | 0.550             |
|                       | min, max | <b>0 , 0.822</b>                        | 0 , 0.804          | 0 , 0.765            | 0 , 0.75          | 0.005 , 0.907                               | 0.002 , 0.897      | 0.002 , 0.875        | 0.001 , 0.866     |
|                       | 90% CI   | <b>0.002 , 0.746</b>                    | 0 , 0.704          | 0.001 , 0.635        | 0 , 0.592         | 0.048 , 0.864                               | 0.017 , 0.839      | 0.027 , 0.797        | 0.009 , 0.769     |
| X                     | Median   | <b>0.736</b>                            | 0.645              | 0.603                | 0.509             | 0.859                                       | 0.804              | 0.777                | 0.714             |
|                       | min, max | <b>0.025 , 0.897</b>                    | 0 , 0.886          | 0.003 , 0.870        | 0 , 0.855         | 0.160 , 0.947                               | 0.012 , 0.942      | 0.056 , 0.933        | 0.004 , 0.925     |
|                       | 90% CI   | <b>0.075 , 0.862</b>                    | 0.003 , 0.833      | 0.013 , 0.810        | 0.001 , 0.771     | 0.277 , 0.929                               | 0.057 , 0.913      | 0.116 , 0.900        | 0.024 , 0.878     |
| <b>Trimmed genome</b> |          |                                         |                    |                      |                   |                                             |                    |                      |                   |
| All                   | Median   | <b>0.643</b>                            | 0.550              | 0.493                | 0.416             | 0.802                                       | 0.742              | 0.702                | 0.645             |
|                       | min, max | <b>0.191 , 0.897</b>                    | 0.004 , 0.886      | 0.074 , 0.870        | 0.006 , 0.855     | 0.438 , 0.947                               | 0.060 , 0.942      | 0.271 , 0.933        | 0.077 , 0.925     |
|                       | 90% CI   | <b>0.411 , 0.814</b>                    | 0.218 , 0.776      | 0.238 , 0.730        | 0.137 , 0.684     | 0.641 , 0.902                               | 0.467 , 0.881      | 0.488 , 0.854        | 0.370 , 0.827     |
| Autosomes             | Median   | <b>0.619</b>                            | 0.517              | 0.467                | 0.386             | 0.787                                       | 0.719              | 0.683                | 0.621             |
|                       | min, max | <b>0.191 , 0.822</b>                    | 0.004 , 0.804      | 0.074 , 0.765        | 0.006 , 0.75      | 0.438 , 0.907                               | 0.060 , 0.897      | 0.271 , 0.875        | 0.077 , 0.866     |
|                       | 90% CI   | <b>0.392 , 0.757</b>                    | 0.196 , 0.719      | 0.223 , 0.654        | 0.12 , 0.615      | 0.626 , 0.870                               | 0.443 , 0.848      | 0.472 , 0.809        | 0.346 , 0.784     |
| X                     | Median   | <b>0.761</b>                            | 0.683              | 0.641                | 0.561             | 0.873                                       | 0.827              | 0.801                | 0.749             |
|                       | min, max | <b>0.471 , 0.897</b>                    | 0.147 , 0.886      | 0.226 , 0.870        | 0.091 , 0.855     | 0.687 , 0.947                               | 0.385 , 0.942      | 0.476 , 0.933        | 0.302 , 0.925     |
|                       | 90% CI   | <b>0.576 , 0.866</b>                    | 0.386 , 0.838      | 0.388 , 0.819        | 0.249 , 0.781     | 0.760 , 0.931                               | 0.623 , 0.916      | 0.623 , 0.905        | 0.500 , 0.884     |

\* Model  $M_{LN,StdMut,CO+GC}$  is the default model.
