# Supplementary material for: Background Selection as Baseline for Nucleotide Variation across the Drosophila Genome
Source: PubMed Central journal article supplement (PMC4072542; doi:10.1371/journal.pgen.1004434), 2014-06-26
Supplement: pgen.1004434.s005.pdf [file pgen.1004434.s005.pdf]

**Table S3. Pairwise Spearman's rank correlation coefficients ( $\rho$ ) between estimates of  $B$  from different BGS models\***

|                       | $M_{LN,CO+GC,StdMut}$ | $M_{LN,CO,StdMut}$ | $M_{G,CO+GC,StdMut}$ | $M_{G,CO,StdMut}$ | $M_{LN,CO+GC,LowMut}$ | $M_{LN,CO,LowMut}$ | $M_{G,CO+GC,LowMut}$ |
|-----------------------|-----------------------|--------------------|----------------------|-------------------|-----------------------|--------------------|----------------------|
| $M_{LN,CO,StdMut}$    | 0.98784               |                    |                      |                   |                       |                    |                      |
| $M_{G,CO+GC,StdMut}$  | 0.99792               | 0.98569            |                      |                   |                       |                    |                      |
| $M_{G,CO,StdMut}$     | 0.99132               | 0.99717            | 0.99303              |                   |                       |                    |                      |
| $M_{LN,CO+GC,LowMut}$ | 0.99999               | 0.98760            | 0.99782              | 0.99105           |                       |                    |                      |
| $M_{LN,CO,LowMut}$    | 0.98798               | 0.99998            | 0.98579              | 0.99713           | 0.98775               |                    |                      |
| $M_{G,CO+GC,LowMut}$  | 0.99796               | 0.98560            | 0.99999              | 0.99293           | 0.99786               | 0.98570            |                      |
| $M_{G,CO,LowMut}$     | 0.99141               | 0.99715            | 0.99310              | 0.99999           | 0.99114               | 0.99714            | 0.99300              |

\* See Materials and Methods for detailed description of the eight BGS models.  $P < 1 \times 10^{-12}$  in all cases.
